# Supplementary material
Source: MDPI journal article supplement (https://www.mdpi.com/2071-1050/11/23/6634)
Supplement: s1 [file s1]

## Supplementary Materials

This Supplementary Materials presents the questionnaire in which the research is partially based in detail.

( ) indicates unique response; [ ] indicates possibility of multiple answers)

### A NGOs Characterization

A.1 How many paid staff work in your organization?

- ☐ 0 (my organization relies solely on volunteers)
- ☐ 1–10
- ☐ 11–50
- ☐ 51–100
- ☐ over 100

A.2 What was the latest annual budget of your organisation including project implementation and running costs?

- ☐ less than USD 25,000
- ☐ USD 25,000–USD 200,000
- ☐ USD 200,000–USD 1M
- ☐ USD 1M–USD 10M
- ☐ more than USD 10M

A.3 Which of the following would better describe your organisation working strategy? Please, choose only the one that better describe it.

- ☐ Operational: change achieved directly through projects
- ☐ Awareness-Raising, Campaigning and Advocacy: change promoted indirectly through influence on the political system/public opinion
- ☐ Association, Network, Forum for NGOs
- ☐ Funding: proving funds to other NGOs

A.4 In which of the following sectors does your organisation work? Please check all answers that apply.

- ☐ Agriculture, Livestock and Rural Development
- ☐ Banking, Finance, Credit and Micro-credit, Trade and Markets
- ☐ Children and Youth
- ☐ Climate Change
- ☐ Community Building, Disabilities, Ethnic Minorities, Social Protection and Social Development
- ☐ Conflict Prevention and Resolution, Post-Conflict, Fragility, Violence and Peacebuilding
- ☐ Development and Economic Growth, and Sustainable Development
- ☐ Disaster Management, Risk Reduction and Preparedness
- ☐ Education and Culture
- ☐ Emergency Relief, Humanitarian, and Post-Humanitarian Action
- ☐ Environment, Wildlife, Forestry, Fisheries and Natural Resources
- ☐ Food and Nutrition
- ☐ Gender equality and Women's Rights
- ☐ Governance
- ☐ Health, Drug abuse, and Reproductive Health
- ☐ Information and Communications Technology (ICT)
- ☐ Information, Journalism and Media
- ☐ Infrastructure, Transport, Energy, Industry and Mining

- ☐ Law, Justice and Human Rights
- ☐ Poverty
- ☐ Public Management, Government Support, External Debt, Macroeconomics and Fiscal Management
- ☐ Refugees and Internally Displaced Peoples (IDOs)
- ☐ Religious
- ☐ Research, Science and Technology
- ☐ Tourism
- ☐ Urban Development
- ☐ Water, Sanitation and Hygiene (WASH)
- ☐ Other

A.5 What is the scale of implementation of your projects?

- ☐ Local/Community/Grassroots
- ☐ State/Province
- ☐ National
- ☐ Regional/International

A.6 How would you define the places where your organisation works?

- ☐ Projects are mainly implemented in rural areas
- ☐ Projects are mainly implemented in urban areas
- ☐ Projects are implemented in both rural and urban areas

A.7 Is there any Information Management Officer in your organisation?

- ☐ Yes
- ☐ No
- ☐ We do not have an Information Management Officer but use a specialised NGO to manage geographic information

A.7.1 How many? (Access only after positive response to A.7).

- ☐ only 1
- ☐ 2
- ☐ between 3 and 5
- ☐ more than 5

A.7.2 What are their backgrounds? (Access only after positive response to A.7).

- ☐ Geography/Environmental Science
- ☐ Computer science
- ☐ Other (please specify) \_\_\_\_\_

## **B Sustainable Development Goals**

B.1 Is your organisation working towards achieving the 2030 Sustainable Development Goals?

- ☐ Yes
- ☐ No

B.1.1 Many of the 232 indicators in which the 17 Sustainable Development Goals are divided have a Geographical component. How is your organisation integrating that component into your projects? (Access only after positive response to B.1)

- ☐ We are already implementing it
- ☐ We are planning but we have not yet implemented it
- ☐ We are doing nothing about it
- ☐ I do not know

**C Use of Maps**

C.1 Does your organisation use maps?

☐ Yes

☐ No

C.1.1 What do you use maps for? Please check all answers that apply. (Access only after positive response to C.1).

- ☐ Project planning
- ☐ Project monitoring
- ☐ Project evaluation
- ☐ Hazard mapping and risk reduction
- ☐ Communication
- ☐ Promotion of projects/NGO
- ☐ Presenting results
- ☐ Community mapping
- ☐ Other (please specify) \_\_\_\_\_

C.1.2 Why do you use maps? Please check all answers that apply. (Access only after positive response to C.1).

- ☐ They are a necessary tool
- ☐ They are useful
- ☐ Donors request us to use them
- ☐ I do not know
- ☐ Other (please specify) \_\_\_\_\_

C.1.3 What type of maps do you use? What type of support? (Access only after positive response to C.1).

- ☐ We use mainly digital/interactive maps
- ☐ We use mainly paper/pdf maps

C.1.3.1 What type of maps/software do you use? Please check all answers that apply. (Access only after responding option 1 to C.1.3).

- ☐ Commercial desktop GIS
- ☐ Open-source desktop GIS
- ☐ Commercial web-based GIS
- ☐ Open-source web-based GIS

C.1.3.2 How do you use these maps? Please check all answers that apply. (Access only after responding option 1 to C.1.3).

- ☐ We use maps to display and visualise information
- ☐ We use maps to analyse information
- ☐ We use maps to relate data
- ☐ We use maps to compare data
- ☐ We use maps to share data
- ☐ Other (please specify) \_\_\_\_\_

C.1.3.2.1 What type of analysis do you perform? Please check all answers that apply. (Access only after responding option 2 to C.1.3.2).

- ☐ Spatial analysis (i.e., overlying, interpolation, windows, density estimation, buffer, etc.)

- ☐ Optimization
- ☐ Descriptive summaries (i.e., spatial statistics)
- ☐ Image analysis
- ☐ Simulation
- ☐ Modelling
- ☐ Other (please specify) \_\_\_\_\_

C.1.3.3 How do you obtain the information for your maps? Please check all answers that apply. (Access only after responding option 1 to C.1.3).

- ☐ From the Government
- ☐ From international institutions
- ☐ From other NGOs
- ☐ Freely available open-source
- ☐ From private sector
- ☐ Gathering the information directly
- ☐ I do not know
- ☐ Other (please specify) \_\_\_\_\_

C.1.3.3.1 What are the "tools" that you use to gather the information? Please check all answers that apply. (Access only after responding option 6 to C.1.3.3).

- ☐ Questionnaires
- ☐ Paper
- ☐ Smartphone
- ☐ GPS
- ☐ Drones
- ☐ Other aerial
- ☐ Satellites
- ☐ Other (please specify) \_\_\_\_\_

C.1.3.4 Why does your organisation not use digital/interactive maps (i.e., GIS)? (Access only after responding option 2 to C.1.3).

- ☐ We would not know how to use them
- ☐ We do not have enough staff
- ☐ We do not have the necessary equipment
- ☐ There is no digital information in the area where we work
- ☐ They are not useful for our work
- ☐ I do not know
- ☐ Other (please specify) \_\_\_\_\_

C.1.3.5 Does your organisation use OpenStreetMap? (Access only after responding option 2 to C.1.3).

- ☐ Yes
- ☐ No

C.1.3.5.1 How do you use OpenStreetMap? (Access only after positive response to C.1.3.5).

- ☐ We use it to implement our projects
- ☐ We collaborate to improve OpenStreetMap so it can be used for any project in the area
- ☐ Both of the above

C.1.3.5.2 What is the level of use? (Access only after positive response to C.1.3.5).

- ☐ We use OpenStreetMap only as basemap
- ☐ We use OpenStreetMap for advanced GIS (i.e., analysis)

C.1.3.5.3 What resources from OpenStreetMap does your organisation use? Please check all answers that apply. (Access only after positive response to C.1.3.5).

- ☐ We use the map <https://www.openstreetmap.org>
- ☐ We access training resources and e-learning <http://learnosm.org/en/>
- ☐ We use the Task Manager to create a project and to define the area to be mapped
- ☐ We get direct support contacting through [info@hotosm.org](mailto:info@hotosm.org)
- ☐ We have support from Humanitarian OpenStreetMap Team local community
- ☐ We obtain micro-grants for equipment or other needs <https://www.hotosm.org/projects/microgrants> and [community development](#)
- ☐ We obtain aerial imagery <https://openaerialmap.org/>
- ☐ We do geospatial analysis using OpenStreetMap Analytics <http://osm-analytics.org/#/>

C.1.3.5.4 Do you have concerns about using information in an open-source platform? Please check all answers that apply. (Access only after positive response to C.1.3.5).

- ☐ We have security concerns about sharing information in an open platform
- ☐ We have concerns about the privacy of the information
- ☐ We have concerns about the accuracy of the information found in OpenStreetMap
- ☐ We have other concerns (please specify) \_\_\_\_\_

C.1.3.5.5 Why does your organisation not use OpenStreetMap? Please check all answers that apply. (Access only after negative response to C.1.3.5).

- ☐ We did not know about OpenStreetMap until today
- ☐ OpenStreetMap is not useful for our work
- ☐ We have security concerns about sharing information in an open platform
- ☐ We have concerns about the privacy of the information
- ☐ We have concerns about the accuracy of the information found in OpenStreetMap
- ☐ I do not know
- ☐ We have other reasons (please specify) \_\_\_\_\_

C.1.3.5.6 Are you aware that OpenStreetMap offers you the following possibilities? Please select those that you consider could be useful for your organisation. (Access only after negative response to C.1.3.5).

- ☐ Free access map at OpenStreetMap <https://www.openstreetmap.org/>
- ☐ Access to training resources and e-learning <http://learnosm.org/en/>
- ☐ Use the Task Manager to create a project and to define the area to be mapped
- ☐ Direct support for your project contacting through [info@hotosm.org](mailto:info@hotosm.org)
- ☐ Support from Humanitarian OpenStreetMap Team local community
- ☐ Obtain micro-grants for equipment or other needs [https://www.hotosm.org/projects/microgrants\\_and\\_community\\_development](https://www.hotosm.org/projects/microgrants_and_community_development)
- ☐ Obtain aerial imagery <https://openaerialmap.org/>
- ☐ Geospatial analysis using OpenStreetMap Analytics <http://osm-analytics.org/#/>

C.1.4 Why does your organisation not use any type of maps? (Access only after negative response to C.1).

- ☐ We would not know how to use them
- ☐ We do not have enough staff
- ☐ We do not have the necessary equipment
- ☐ There is no information in the area where we work
- ☐ They are not useful for our work
- ☐ I do not know
- ☐ Other (please specify) \_\_\_\_\_

C.1.4.1 Do you have access to internet, a computer and a cheap smartphone? (Access only after responding option 6 to C.1.4).

- ☐ Yes
- ☐ No

C.1.5 Are you aware that OpenStreetMap could support your organisation through the following possibilities? Please select those that you consider could be useful for your organisation. (Access only after negative response to C.1).

- ☐ Free access map at OpenStreetMap <https://www.openstreetmap.org/>
- ☐ Access to training resources and e-learning <http://learnosm.org/en/>
- ☐ Use the Task Manager to create a project and to define the area to be mapped
- ☐ Direct support for your project contacting through [info@hotosm.org](mailto:info@hotosm.org)
- ☐ Support from Humanitarian OpenStreetMap Team local community
- ☐ Obtain micro-grants for equipment or other needs [https://www.hotosm.org/projects/microgrants\\_and\\_community\\_development](https://www.hotosm.org/projects/microgrants_and_community_development)
- ☐ Obtain aerial imagery <https://openaerialmap.org/>
- ☐ Geospatial analysis using OpenStreetMap Analytics <http://osm-analytics.org/#/>
